# Supplementary material for: Time-Resolved Extracellular Matrix Atlas of the Developing Human Skin Dermis
Source: Front Cell Dev Biol. 2021 Nov 26;9:783456. doi: 10.3389/fcell.2021.783456 (PMC8661536; doi:10.3389/fcell.2021.783456)
Supplement: Supplementary file 2 [file Table3.xlsx]

## Sheet: Table S3
Supplementary Table 3 | Highly expressed proteins in the six ECM components at four age stages (toddler, teenager, adult, and elderly).
Category	Protein ID	Gene symbol	log2Normalized Protein Intentisty					Highly expressed age stage
			Ave_Toddler	Ave_Teenager	Ave_Adult	Ave_Elderly	topAveExpr
Collagens	P20908	COL5A1	13.3356	12.35	11.9292	12.1608	13.3356	Toddler
	Q96P44	COL21A1	11.1216	8.89326	7.61097	6.92595	11.1216	Toddler
	Q99715	COL12A1	13.8811	12.4454	12.3957	11.1166	13.8811	Toddler
	P39059	COL15A1	10.1766	8.98462	9.63064	8.83524	10.1766	Toddler
	P05997	COL5A2	12.5478	12.0911	11.7003	12.5318	12.5478	Toddler
	P12107	COL11A1	5.5538	0	5.54727	0	5.5538	Toddler
	Q2UY09	COL28A1	8.50283	11.3991	8.45493	8.2356	11.3991	Teenager
	Q9UMD9	COL17A1	7.93294	10.2173	8.34881	0	10.2173	Teenager
	Q02388	COL7A1	12.7686	15.6357	14.8203	11.258	15.6357	Teenager
	Q05707	COL14A1	14.4564	14.7953	14.2151	12.6152	14.7953	Teenager
	P02461	COL3A1	13.9461	16.18	15.6931	15.7816	16.18	Teenager
	A6NMZ7	COL6A6	11.7507	12.0763	14.1181	10.8124	14.1181	Adult
	P25940	COL5A3	7.10541	9.37221	9.8506	8.48563	9.8506	Adult
	A8TX70	COL6A5	6.27588	13.5225	13.7153	5.91854	13.7153	Adult
	Q07092	COL16A1	8.8737	9.48372	9.62627	7.98157	9.62627	Adult
	P12110	COL6A2	17.5166	18.3671	18.6687	18.5011	18.6687	Adult
	P29400	COL4A5	2.67142	6.48276	7.08819	0	7.08819	Adult
	P39060	COL18A1	10.1615	10.6613	10.8422	6.34005	10.8422	Adult
	P02458	COL2A1	0	0	0	8.31676	8.31676	Elderly
	P27658	COL8A1	0	0	0	8.29021	8.29021	Elderly
	Q03692	COL10A1	0	0	0	5.22999	5.22999	Elderly
	P02452	COL1A1	17.3213	18.1115	18.0438	19.8919	19.8919	Elderly
	P08123	COL1A2	17.3301	17.828	17.6274	18.7055	18.7055	Elderly
	P08572	COL4A2	10.5735	11.316	11.7219	12.6059	12.6059	Elderly
	P12111	COL6A3	17.4498	17.7551	17.7689	18.0142	18.0142	Elderly
	P12109	COL6A1	17.9576	18.6087	18.9572	19.2456	19.2456	Elderly
	Q14031	COL4A6	5.05933	8.6846	8.62425	9.95654	9.95654	Elderly
	P02462	COL4A1	9.65095	12.0185	12.0408	12.6285	12.6285	Elderly
ECM Glycoproteins	Q6UXI9	NPNT	4.41816	0	0	0	4.41816	Toddler
	O75094	SLIT3	4.30913	0	0	0	4.30913	Toddler
	P35442	THBS2	7.39809	4.90883	5.71389	4.288	7.39809	Toddler
	Q9NT22	EMILIN3	12.567	9.50273	8.26826	6.05762	12.567	Toddler
	P07942	LAMB1	10.225	9.29485	9.63838	8.61131	10.225	Toddler
	Q8N2S1	LTBP4	8.43295	7.21783	7.22823	0	8.43295	Toddler
	Q92626	PXDN	10.141	6.10635	6.34977	8.98404	10.141	Toddler
	O00468	AGRN	6.39822	3.24519	2.90913	5.56702	6.39822	Toddler
	Q86XX4	FRAS1	5.02886	3.04065	1.65439	0	5.02886	Toddler
	Q8NDA2	HMCN2	6.16545	2.30276	4.20634	0	6.16545	Toddler
	Q9Y6N6	LAMC3	5.11228	4.14732	2.98927	0	5.11228	Toddler
	Q9Y6C2	EMILIN1	14.0552	12.7676	13.9845	12.074	14.0552	Toddler
	O60687	SRPX2	7.42973	4.24856	6.54368	7.08544	7.42973	Toddler
	Q6ZMP0	THSD4	7.1511	6.49119	3.66607	0	7.1511	Toddler
	Q4ZHG4	FNDC1	8.33602	6.35304	0	0	8.33602	Toddler
	Q5GFL6	VWA2	8.28397	0	4.71629	0	8.28397	Toddler
	O43405	COCH	0	6.25617	0	0	6.25617	Teenager
	Q7Z7G0	ABI3BP	7.64739	12.7618	8.82581	10.0209	12.7618	Teenager
	P78539	SRPX	8.80185	11.0119	9.9505	9.60105	11.0119	Teenager
	P22105	TNXB	10.2022	13.3627	11.8869	9.56123	13.3627	Teenager
	Q16787	LAMA3	7.80517	11.6404	10.2875	8.38127	11.6404	Teenager
	Q08431	MFGE8	0	8.13824	7.2496	7.18721	8.13824	Teenager
	Q13751	LAMB3	10.048	13.42	12.1126	8.49836	13.42	Teenager
	P55083	MFAP4	14.4481	18.4359	17.0965	16.7626	18.4359	Teenager
	O94769	ECM2	7.6017	7.97832	6.49759	7.16267	7.97832	Teenager
	Q15063	POSTN	15.3007	17.9296	17.0178	13.8349	17.9296	Teenager
	Q13361	MFAP5	13.8745	16.3496	15.8635	14.0079	16.3496	Teenager
	Q13753	LAMC2	7.68044	12.5383	11.4382	5.71187	12.5383	Teenager
	O00339	MATN2	8.89963	11.1799	10.6257	7.56161	11.1799	Teenager
	P24043	LAMA2	5.02485	7.37471	7.13345	5.76775	7.37471	Teenager
	Q15582	TGFBI	13.5004	16.1708	16.0142	13.6149	16.1708	Teenager
	Q6PCB0	VWA1	8.68115	11.0829	11.0762	7.91663	11.0829	Teenager
	Q9NR99	MXRA5	3.56263	5.62153	5.41282	1.41364	5.62153	Teenager
	Q8IUX7	AEBP1	10.4051	11.2719	10.2764	7.09221	11.2719	Teenager
	P14543	NID1	10.492	12.0429	11.9387	11.6054	12.0429	Teenager
	Q14314	FGL2	0	9.5608	9.20059	7.43029	9.5608	Teenager
	O95460	MATN4	0	5.98049	4.78747	0	5.98049	Teenager
	A4D0S4	LAMB4	0	7.75755	5.92286	0	7.75755	Teenager
	O00534	VWA5A	6.44536	7.84091	7.72065	0	7.84091	Teenager
	Q15848	ADIPOQ	0	0	7.91562	0	7.91562	Adult
	Q13201	MMRN1	0	0	3.83083	0	3.83083	Adult
	P24821	TNC	8.90768	9.21928	11.3571	8.08131	11.3571	Adult
	Q9H8L6	MMRN2	2.29927	4.10785	5.69361	3.32163	5.69361	Adult
	P35443	THBS4	3.76032	3.76368	8.90477	0	8.90477	Adult
	Q6UXI7	VIT	0	5.63706	6.2441	5.43692	6.2441	Adult
	P02751	FN1	12.6756	12.9076	13.7269	11.1964	13.7269	Adult
	O95967	EFEMP2	9.23962	9.92292	10.6475	0	10.6475	Adult
	Q16610	ECM1	5.2557	8.21431	8.77838	6.741	8.77838	Adult
	P02671	FGA	13.6911	14.7353	15.006	12.9026	15.006	Adult
	P02679	FGG	14.1101	15.6599	16.0749	15.2885	16.0749	Adult
	Q14112	NID2	10.0771	10.1761	11.1464	6.87448	11.1464	Adult
	Q16363	LAMA4	9.88344	9.44672	10.2436	7.88933	10.2436	Adult
	Q14766	LTBP1	8.31364	6.81274	8.95174	0	8.95174	Adult
	O95428	PAPLN	6.7808	7.66426	7.99586	4.59868	7.99586	Adult
	P04275	VWF	8.60916	8.65233	8.96108	7.242	8.96108	Adult
	Q12805	EFEMP1	10.4619	11.6024	12.2719	12.1801	12.2719	Adult
	Q53RD9	FBLN7	13.419	12.313	13.7204	0	13.7204	Adult
	O76076	WISP2	0	9.41222	12.4565	11.9312	12.4565	Adult
	P98095	FBLN2	9.95879	13.6016	14.4943	14.0385	14.4943	Adult
	P35858	IGFALS	0	8.26731	8.34276	0	8.34276	Adult
	P02750	LRG1	0	4.79987	5.84921	0	5.84921	Adult
	Q8TER0	SNED1	0	2.72995	4.05394	0	4.05394	Adult
	Q9GZM7	TINAGL1	8.27304	11.9792	13.1045	12.9004	13.1045	Adult
	Q9HCB6	SPON1	6.84232	4.27441	7.12935	0	7.12935	Adult
	Q96RW7	HMCN1	9.0898	8.43869	9.15926	4.04174	9.15926	Adult
	P11047	LAMC1	11.6532	12.5965	12.6093	12.4886	12.6093	Adult
	Q9BXX0	EMILIN2	8.88414	8.88186	8.98283	7.09351	8.98283	Adult
	Q15113	PCOLCE	11.9341	12.051	12.0964	9.10338	12.0964	Adult
	P49746	THBS3	10.5613	10.2414	9.75757	16.8731	16.8731	Elderly
	P09486	SPARC	9.34601	8.57668	9.62503	12.1543	12.1543	Elderly
	P55001	MFAP2	15.8582	15.4997	15.6574	16.5631	16.5631	Elderly
	Q8WU66	TSPEAR	5.29257	5.53657	4.7457	6.82834	6.82834	Elderly
	P15502	ELN	10.7245	6.57263	9.74193	17.3706	17.3706	Elderly
	P35555	FBN1	13.5226	14.7367	14.5213	16.7378	16.7378	Elderly
	Q96CG8	CTHRC1	9.08579	8.73882	7.96084	9.83096	9.83096	Elderly
	Q9UBX5	FBLN5	12.2448	12.7402	11.4183	13.0897	13.0897	Elderly
	O15230	LAMA5	9.96964	10.717	10.4343	10.9027	10.9027	Elderly
	P04004	VTN	12.0262	11.8247	14.5949	14.731	14.731	Elderly
	P02675	FGB	14.235	15.8829	16.0761	16.5471	16.5471	Elderly
	Q07507	DPT	16.2594	18.1549	17.6	18.4052	18.4052	Elderly
	P55268	LAMB2	10.8332	12.0263	12.2953	12.5007	12.5007	Elderly
	P35556	FBN2	9.478	8.35292	3.24893	10.0704	10.0704	Elderly
	O75339	CILP	0	0	6.2232	7.73032	7.73032	Elderly
	Q75N90	FBN3	4.32244	0	0	5.60183	5.60183	Elderly
	Q8IVN8	SBSPON	0	6.89857	0	7.85605	7.85605	Elderly
	P08493	MGP	0	0	8.63674	10.448	10.448	Elderly
ECM Regulators	P29508	SERPINB3	5.8705	0	0	0	5.8705	Toddler
	Q8N6G6	ADAMTSL1	5.54601	0	0	0	5.54601	Toddler
	P13674	P4HA1	11.0122	6.24809	6.01173	6.65582	11.0122	Toddler
	P01019	AGT	11.6211	8.90688	9.10944	8.24763	11.6211	Toddler
	O15460	P4HA2	10.6751	7.06854	4.93456	5.09935	10.6751	Toddler
	Q8IVL6	LEPREL2	10.1581	5.26851	5.05667	0	10.1581	Toddler
	Q02809	PLOD1	11.0038	6.80124	7.40387	0	11.0038	Toddler
	O60911	CTSV	9.43983	6.91762	7.28713	0	9.43983	Toddler
	Q15828	CST6	10.7452	0	9.00463	8.49616	10.7452	Toddler
	Q32P28	LEPRE1	11.4621	7.9843	8.53207	3.57234	11.4621	Toddler
	P07858	CTSB	10.1978	9.28736	9.86936	8.86242	10.1978	Toddler
	P50454	SERPINH1	17.0389	13.9384	13.64	8.43448	17.0389	Toddler
	O60568	PLOD3	9.03486	5.11673	6.94126	0	9.03486	Toddler
	Q9UBR2	CTSZ	7.79499	7.39195	6.82857	0	7.79499	Toddler
	P50453	SERPINB9	7.39187	6.65871	7.21997	0	7.39187	Toddler
	P19823	ITIH2	13.1179	12.2805	12.5702	8.38976	13.1179	Toddler
	Q6UY14	ADAMTSL4	5.35022	0	3.40183	0	5.35022	Toddler
	P50281	MMP14	6.24012	0	6.07681	0	6.24012	Toddler
	Q96IV0	NGLY1	4.72925	0	3.51063	0	4.72925	Toddler
	Q6YHK3	CD109	9.43091	9.0766	8.47819	5.0256	9.43091	Toddler
	P53634	CTSC	8.87047	6.36492	8.51986	0	8.87047	Toddler
	P22735	TGM1	0	4.65564	0	0	4.65564	Teenager
	P36952	SERPINB5	11.212	12.0171	11.2801	10.7402	12.0171	Teenager
	Q08188	TGM3	5.01188	9.30909	6.93777	7.99667	9.30909	Teenager
	Q96P63	SERPINB12	9.04637	10.1167	8.46905	0	10.1167	Teenager
	P08253	MMP2	7.36521	9.44292	8.95439	7.3524	9.44292	Teenager
	A8K2U0	A2ML1	6.81456	8.35144	5.71398	0	8.35144	Teenager
	P05120	SERPINB2	6.60337	8.42242	7.55446	8.15554	8.42242	Teenager
	P00488	F13A1	12.3153	15.2628	14.9727	10.5874	15.2628	Teenager
	P35237	SERPINB6	10.288	11.4118	10.9298	8.02421	11.4118	Teenager
	P19827	ITIH1	12.3307	12.8031	12.0083	9.95573	12.8031	Teenager
	P08519	LPA	0	3.82399	2.65638	0	3.82399	Teenager
	Q8IW75	SERPINA12	0	6.6259	2.88322	0	6.6259	Teenager
	P01023	A2M	13.37	13.4642	13.377	12.5511	13.4642	Teenager
	P36955	SERPINF1	11.8336	12.0203	11.822	9.73644	12.0203	Teenager
	Q99542	MMP19	0	0	9.41257	0	9.41257	Adult
	P43235	CTSK	0	0	7.94709	0	7.94709	Adult
	P29622	SERPINA4	7.48643	7.55462	8.38879	7.48932	8.38879	Adult
	P01042	KNG1	10.2677	10.2494	11.0772	10.4026	11.0772	Adult
	P01008	SERPINC1	10.9206	11.1663	12.1596	10.221	12.1596	Adult
	P08697	SERPINF2	9.68036	10.0385	11.2377	8.78906	11.2377	Adult
	P01009	SERPINA1	15.0699	14.6851	15.3974	14.5772	15.3974	Adult
	P00747	PLG	10.3553	11.3337	11.9608	10.6201	11.9608	Adult
	P07339	CTSD	10.8742	10.9705	11.6002	10.2608	11.6002	Adult
	Q14624	ITIH4	7.74792	9.07718	10.2533	7.0006	10.2533	Adult
	P50452	SERPINB8	5.31623	5.56232	6.98	3.77428	6.98	Adult
	P04080	CSTB	7.52554	7.67972	9.03473	0	9.03473	Adult
	P04196	HRG	0	9.84221	11.5042	10.2095	11.5042	Adult
	P21980	TGM2	7.08622	5.63621	7.80893	6.65655	7.80893	Adult
	P08185	SERPINA6	8.06987	7.47641	8.92125	8.50624	8.92125	Adult
	Q92743	HTRA1	5.1807	6.58399	10.8556	9.45653	10.8556	Adult
	P30740	SERPINB1	10.1452	12.2399	12.7492	9.956	12.7492	Adult
	P00748	F12	3.69429	5.30099	6.77159	0	6.77159	Adult
	Q86UX2	ITIH5	4.5788	6.47105	8.12166	0	8.12166	Adult
	P05546	SERPIND1	9.56326	10.8918	11.0336	8.9992	11.0336	Adult
	P00734	F2	9.21452	10.2886	11.1096	6.4939	11.1096	Adult
	O75635	SERPINB7	0	6.25366	6.27506	0	6.27506	Adult
	P07093	SERPINE2	0	4.73664	7.09098	0	7.09098	Adult
	P39900	MMP12	0	0	8.48076	5.45888	8.48076	Adult
	P00740	F9	0	5.31898	6.10903	0	6.10903	Adult
	P22792	CPN2	0	6.71231	6.77437	0	6.77437	Adult
	P05154	SERPINA5	3.52857	7.00711	7.33021	0	7.33021	Adult
	Q06033	ITIH3	2.98208	8.02909	8.34296	0	8.34296	Adult
	P05155	SERPING1	11.2804	11.226	11.31	9.49233	11.31	Adult
	Q2M2W7	C17orf58	0	0	0	12.0179	12.0179	Elderly
	O43548	TGM5	0	0	0	6.82932	6.82932	Elderly
	P20742	PZP	0	0	0	6.21995	6.21995	Elderly
	P01011	SERPINA3	11.0255	10.5939	11.4701	11.9969	11.9969	Elderly
	P35625	TIMP3	8.66288	5.74085	9.3449	12.053	12.053	Elderly
	P00742	F10	4.76063	5.15488	5.65777	6.1464	6.1464	Elderly
	P03973	SLPI	0	9.60493	10.5877	13.4587	13.4587	Elderly
	P28300	LOX	11.6943	13.3856	12.474	13.8126	13.8126	Elderly
	P02760	AMBP	9.58361	13.455	13.6296	15.506	15.506	Elderly
	P08311	CTSG	13.1444	12.8345	13.8976	13.9483	13.9483	Elderly
	P48594	SERPINB4	0	0	7.07379	7.44098	7.44098	Elderly
	Q08397	LOXL1	8.29747	0	0	9.87488	9.87488	Elderly
ECM-affiliated Proteins	Q5KU26	COLEC12	8.53235	0	0	0	8.53235	Toddler
	O75487	GPC4	7.23821	0	0	0	7.23821	Toddler
	P13928	ANXA8	6.38228	0	0	0	6.38228	Toddler
	Q6UVK1	CSPG4	8.93097	5.45222	5.83002	4.75944	8.93097	Toddler
	Q5SZK8	FREM2	9.19536	1.60528	2.16899	0	9.19536	Toddler
	P49257	LMAN1	13.0422	11.0922	11.4038	0	13.0422	Toddler
	Q6UX71	PLXDC2	7.73063	6.4295	5.43653	0	7.73063	Toddler
	P08758	ANXA5	15.18	13.6331	13.4329	10.6648	15.18	Toddler
	O15031	PLXNB2	4.41097	3.04545	3.6487	0	4.41097	Toddler
	P12429	ANXA3	8.78241	7.48945	4.48154	7.02893	8.78241	Toddler
	P08133	ANXA6	14.2028	12.9414	13.4665	10.6245	14.2028	Toddler
	Q5H8C1	FREM1	4.42817	2.78577	0	0	4.42817	Toddler
	P04083	ANXA1	13.3996	13.3392	12.7957	10.6402	13.3996	Toddler
	Q9BXJ5	C1QTNF2	0	7.93751	0	0	7.93751	Teenager
	P09525	ANXA4	12.0346	13.1513	12.0006	11.9644	13.1513	Teenager
	P47929	LGALS7	13.6291	16.0963	14.3264	12.3751	16.0963	Teenager
	P17931	LGALS3	10.8362	12.7762	11.8871	9.20436	12.7762	Teenager
	Q9Y240	CLEC11A	5.39491	5.76539	4.94442	0	5.76539	Teenager
	P09382	LGALS1	12.0849	14.5001	14.2541	9.9574	14.5001	Teenager
	Q9BXJ2	C1QTNF7	0	9.78235	6.76298	0	9.78235	Teenager
	P07355	ANXA2	16.1211	16.4806	16.0677	13.3955	16.4806	Teenager
	P20073	ANXA7	10.625	10.8389	10.4813	7.72763	10.8389	Teenager
	P50995	ANXA11	10.4945	10.6642	10.5836	7.54131	10.6642	Teenager
	P18827	SDC1	0	0	6.81274	0	6.81274	Adult
	P02790	HPX	12.02	13.2789	14.7286	11.8105	14.7286	Adult
	P02747	C1QC	10.5531	11.4409	11.7384	10.6143	11.7384	Adult
	P02745	C1QA	9.72341	10.5243	10.6999	9.7419	10.6999	Adult
	P02746	C1QB	10.2301	11.4175	11.6755	10.5772	11.6755	Adult
Proteoglycans	P16112	ACAN	8.07485	0	0	0	8.07485	Toddler
	P13727	PRG2	10.3993	5.31286	7.43992	7.90152	10.3993	Toddler
	Q9Y2Y8	PRG3	9.62774	6.87675	6.61177	0	9.62774	Toddler
	Q96S86	HAPLN3	5.58789	4.46381	0	0	5.58789	Toddler
	Q9BXN1	ASPN	12.4096	14.5431	13.3727	13.2659	14.5431	Teenager
	P51884	LUM	16.1666	18.0973	17.1622	16.0215	18.0973	Teenager
	Q06828	FMOD	11.7813	13.0641	12.6152	11.2262	13.0641	Teenager
	Q99983	OMD	5.10275	9.26521	7.97923	7.71837	9.26521	Teenager
	P21810	BGN	13.3965	16.0514	14.5543	15.7086	16.0514	Teenager
	P51888	PRELP	12.8888	16.5728	15.6421	16.5543	16.5728	Teenager
	P98160	HSPG2	12.8131	12.8384	13.4312	13.0848	13.4312	Adult
	Q7Z5L7	PODN	8.15696	9.9022	10.2811	7.88561	10.2811	Adult
	Q92954	PRG4	0	0	0	5.73615	5.73615	Elderly
	P07585	DCN	14.9639	17.4485	16.926	18.8081	18.8081	Elderly
	P13611	VCAN	12.3158	11.9142	10.6747	12.8001	12.8001	Elderly
	P20774	OGN	14.8669	18.5427	16.9155	19.0243	19.0243	Elderly
	P10915	HAPLN1	4.4832	0	0	7.13035	7.13035	Elderly
Secreted Factors	Q07283	TCHH	10.4422	4.83489	3.99407	6.59049	10.4422	Toddler
	P51610	HCFC1	8.52718	6.23243	6.43094	5.15732	8.52718	Toddler
	O75095	MEGF6	7.91611	6.31654	7.52954	0	7.91611	Toddler
	P33764	S100A3	10.9622	7.74751	0	0	10.9622	Toddler
	O95715	CXCL14	11.1881	0	9.25337	0	11.1881	Toddler
	Q9HCY8	S100A14	8.97086	10.4973	9.2201	9.49261	10.4973	Teenager
	P60903	S100A10	12.4997	15.6793	14.7447	12.9017	15.6793	Teenager
	Q96FQ6	S100A16	10.2716	10.4701	10.4126	0	10.4701	Teenager
	P04271	S100B	0	10.7676	9.64893	0	10.7676	Teenager
	Q86XS5	ANGPTL5	0	6.76856	5.09514	0	6.76856	Teenager
	Q99584	S100A13	0	12.1519	12.0092	0	12.1519	Teenager
	P06703	S100A6	11.5835	15.0153	14.6501	0	15.0153	Teenager
	P26447	S100A4	10.1063	13.045	12.9232	0	13.045	Teenager
	O00585	CCL21	0	0	8.35615	0	8.35615	Adult
	P55774	CCL18	0	0	6.99103	0	6.99103	Adult
	P01137	TGFB1	0	0	5.30547	0	5.30547	Adult
	Q96HF1	SFRP2	4.6976	5.25248	7.39754	5.62662	7.39754	Adult
	P31949	S100A11	12.0087	12.4257	13.3177	11.4509	13.3177	Adult
	P29034	S100A2	7.20965	8.09015	9.93983	0	9.93983	Adult
	P05109	S100A8	8.26405	10.3283	12.9601	11.8992	12.9601	Adult
	Q9UKU9	ANGPTL2	6.76357	5.07212	7.96764	0	7.96764	Adult
	P06702	S100A9	9.99969	11.1836	13.4102	13.2676	13.4102	Adult
	Q9NRJ3	CCL28	0	0	0	11.5234	11.5234	Elderly
	P49765	VEGFB	0	0	0	7.86587	7.86587	Elderly
	P23297	S100A1	0	0	0	7.75814	7.75814	Elderly
	P31151	S100A7	0	7.26865	7.71257	11.6575	11.6575	Elderly
	P48061	CXCL12	0	9.37435	12.6269	13.9857	13.9857	Elderly
	O75888	TNFSF13	0	7.68341	0	11.9249	11.9249	Elderly
